# Supplementary material
Source: PubMed Central journal article supplement (PMC7951132)
Supplement: 43450_2021_132_MOESM1_ESM.pdf [file 43450_2021_132_MOESM1_ESM.pdf]

## SUPPLEMENTARY DATA

**Table 1: Chinese Traditional Medicine and COVID-19**

| Herbal Items<br>/Herbal decoctions                                                                                                                                     | Plant(s) of Origin                                                                                           | Part(s) in Use                        | Ethnomedicinal Use                                         | Use of herbal<br>composition                                                                                                                         | Anti-Covid-19<br>Mechanisms                                                                                                                                                                              | Ref                                                                                                                                                                                    |
|------------------------------------------------------------------------------------------------------------------------------------------------------------------------|--------------------------------------------------------------------------------------------------------------|---------------------------------------|------------------------------------------------------------|------------------------------------------------------------------------------------------------------------------------------------------------------|----------------------------------------------------------------------------------------------------------------------------------------------------------------------------------------------------------|----------------------------------------------------------------------------------------------------------------------------------------------------------------------------------------|
| <b>Qingfei Paidu Herbal Formulation</b><br>(a decoction of Ma Xing Shi Gan, MSXG; She Gan Ma Huang, SGMH; Xiao Chai Hu, XCH; and Wu Ling San, WLS herbal preparations) |                                                                                                              |                                       |                                                            |                                                                                                                                                      |                                                                                                                                                                                                          |                                                                                                                                                                                        |
| <i>Herba ephedrae</i> ,                                                                                                                                                | <i>Ephedra sinica</i> Stapf., <i>E. equisetina</i> Bge.,<br><i>E. intermedia</i> Schrenket CA. Mey.          | Grass stem                            | Dyspnea, cough, promote<br>urination                       | Treatment of common<br>cold, flu, cough fever,<br>and influenza virus in-<br>fections. Damages the<br>viral surface structure<br>and prevents entry. | Direct inhibition of<br>SARS-COV2 cellu-<br>lar adsorption, entry<br>and replication, viral<br>surface structure da-<br>mage and promotion<br>of anti-inflammatory<br>signalling and immu-<br>regulation | (Shi-Ying et al. 2020)<br>(Hsieh et al. 2012)<br>(Ang et al. 2020)<br>(Liu 2020)<br>(Kong et al. 2020)<br>(Liu et al. 2020)<br>(Chen et al. 2020)<br>(Yang et al. 2020)<br>(Wiki 2020) |
| <i>Radix glycyrrhizae</i> ,                                                                                                                                            | <i>Glycyrrhiza uralensis</i> Fisch.,<br><i>Glycyrrhiza inflata</i> , <i>Glycyrrhiza glabra</i> L.,           | Root                                  | Phlegm, cough, dyspnea,<br>pain                            |                                                                                                                                                      |                                                                                                                                                                                                          |                                                                                                                                                                                        |
| <i>Semen armeniaca</i><br><i>amarum</i> ,                                                                                                                              | <i>Prunus armeniaca</i> L., <i>P. sibirica</i> L.<br><i>P. mandshurica</i> ,                                 | Seed                                  | Cough, dyspnea, gastroin-<br>testinal disorders            |                                                                                                                                                      |                                                                                                                                                                                                          |                                                                                                                                                                                        |
| <i>Gypsum fibrosum</i>                                                                                                                                                 | N.A                                                                                                          | Stone containing<br>CaSO <sub>4</sub> | Dyspnea and cough                                          |                                                                                                                                                      |                                                                                                                                                                                                          |                                                                                                                                                                                        |
| <b>She Gan Ma Huang decoction (SGMH)</b>                                                                                                                               |                                                                                                              |                                       |                                                            |                                                                                                                                                      |                                                                                                                                                                                                          |                                                                                                                                                                                        |
| <i>Herba ephedrae</i> ,                                                                                                                                                | <i>Ephedra sinica</i> , <i>E. intermedia</i> ,<br><i>E. equisetina</i> stem                                  |                                       |                                                            | Treatment of inflamm-<br>atory conditions sore<br>throat, asthma and flu.                                                                            |                                                                                                                                                                                                          |                                                                                                                                                                                        |
| <i>Rhizome pinelliae preparata</i> ,                                                                                                                                   | <i>Pinelliae Rhizoma</i>                                                                                     | Rhizome                               | Phlegm, cough                                              |                                                                                                                                                      |                                                                                                                                                                                                          |                                                                                                                                                                                        |
| <i>Rhizoma zingiberis recens</i> ,                                                                                                                                     | <i>Zingiber officinale</i> Rosc                                                                              | Rhizome                               | Flatulence, nausea                                         |                                                                                                                                                      |                                                                                                                                                                                                          |                                                                                                                                                                                        |
| <i>Radix asteris</i> ,                                                                                                                                                 | <i>Aster tataricus</i> L.                                                                                    | root                                  | Cough with phlegm                                          |                                                                                                                                                      |                                                                                                                                                                                                          |                                                                                                                                                                                        |
| <i>Flos farfarae</i> ,                                                                                                                                                 | <i>Tussilago farfara</i> L.                                                                                  | flower bud                            | Airway illness, neurolo-<br>gical disorders                |                                                                                                                                                      |                                                                                                                                                                                                          |                                                                                                                                                                                        |
| <i>Rhizoma belamcandae</i> ,                                                                                                                                           | <i>Belamcanda chinensis</i> (L.) DC.                                                                         | Rhizome                               | Sore throat, cough, asthma                                 | Common cold, cough, pain                                                                                                                             |                                                                                                                                                                                                          |                                                                                                                                                                                        |
| <i>Herba asari</i> (wild ginger)                                                                                                                                       | <i>Asarum splendens</i>                                                                                      |                                       |                                                            |                                                                                                                                                      |                                                                                                                                                                                                          |                                                                                                                                                                                        |
| <b>Xiao Chai Hu, XCH</b>                                                                                                                                               |                                                                                                              |                                       |                                                            |                                                                                                                                                      |                                                                                                                                                                                                          |                                                                                                                                                                                        |
| <i>Radix glycyrrhizae</i> ,                                                                                                                                            | <i>Glycyrrhiza uralensis</i> Fisch., <i>Glycyrrhiza</i><br><i>inflata</i> Bat. <i>Glycyrrhiza glabra</i> L., | Root                                  | Phlegm, cough and dyspnea,<br>pain                         | Treatment of viral infe-<br>ction, cough, cancerous<br>tumors                                                                                        |                                                                                                                                                                                                          |                                                                                                                                                                                        |
| <i>Radix bupleuri</i> ,                                                                                                                                                | <i>Bupleurum chinensis</i> DC. or<br><i>Bupleurum scorzonerifolium</i>                                       | Root                                  | Viral infections, flu, cold                                |                                                                                                                                                      |                                                                                                                                                                                                          |                                                                                                                                                                                        |
| <i>Radix scutellariae</i> ,                                                                                                                                            | <i>Scutellariae baicalensis</i> Georgi.                                                                      | Root                                  | Hepatitis, viral infections<br>inflammation, liver disease |                                                                                                                                                      |                                                                                                                                                                                                          |                                                                                                                                                                                        |
| <i>Rhizome pinelliae preparata</i> ,                                                                                                                                   | <i>Pinelliae Rhizoma</i>                                                                                     | Rhizome                               | Phlegm, cough                                              | flatulence, nausea                                                                                                                                   |                                                                                                                                                                                                          |                                                                                                                                                                                        |
| <i>Rhizoma zingiberis recens</i>                                                                                                                                       | <i>Zingiber officinale</i> Rosc                                                                              | Rhizome                               |                                                            |                                                                                                                                                      |                                                                                                                                                                                                          |                                                                                                                                                                                        |
| <b>Wu Ling San (WLS)</b>                                                                                                                                               |                                                                                                              |                                       |                                                            |                                                                                                                                                      |                                                                                                                                                                                                          |                                                                                                                                                                                        |
| <i>Ramulus cinnamomi</i> ,                                                                                                                                             | <i>Cinnamomum cassia</i> Presl.                                                                              | Burgeon/bud                           | Body pain, common cold                                     | Used in the improvement<br>of renal function and treat-<br>ment of inflammatory dis-<br>orders                                                       |                                                                                                                                                                                                          |                                                                                                                                                                                        |
| <i>Rhizoma alismatis</i> ,                                                                                                                                             | <i>Alisma orientalis</i> (Sam.) Juzep.                                                                       | Stem tuber                            | Edema, dysuria, phlegm, dia-<br>rrhea                      |                                                                                                                                                      |                                                                                                                                                                                                          |                                                                                                                                                                                        |
| <i>Polyporus umbellatus</i> ,                                                                                                                                          | <i>Polyporus umbellatus</i>                                                                                  | Sclerotium                            | Edema, dysuria, diarrhea                                   |                                                                                                                                                      |                                                                                                                                                                                                          |                                                                                                                                                                                        |
| <i>Rhizoma atractylodis</i> ,                                                                                                                                          | <i>Atractylodes macrocephala</i> Koidz.                                                                      | Rhizome                               | Diarrhea, phlegm, edema,                                   | Edema, cold, diuretics                                                                                                                               |                                                                                                                                                                                                          |                                                                                                                                                                                        |
| <i>macrocephalae</i><br>Poria,                                                                                                                                         | Eumycete Poria cocos (schw)                                                                                  | Sclerotium                            |                                                            |                                                                                                                                                      |                                                                                                                                                                                                          |                                                                                                                                                                                        |

**Da Yuan Yin Formulation**

|                                        |                                                                                                    |                |                                                           |                                                                                                                            |                                                                                                                                                                                                          |                                                           |
|----------------------------------------|----------------------------------------------------------------------------------------------------|----------------|-----------------------------------------------------------|----------------------------------------------------------------------------------------------------------------------------|----------------------------------------------------------------------------------------------------------------------------------------------------------------------------------------------------------|-----------------------------------------------------------|
| <i>Semen arecae</i>                    | Areca catechu L                                                                                    | Seed           | Gastrointestinal disorders, parasitic diseases            | Relief of chest congestion                                                                                                 | Promotion of anti-inflammatory and immunoregulatory signaling involving various cytokines target and biological processes including the AGE-RAGE signaling pathway implicated in diabetic complications. | (Ruan et al. 2020)<br>(Huan-Tian Cui 2020)<br>(Wiki 2020) |
| <i>Cortex Magnoliae officinalis</i> ,  | Magnolia officinalis Rehd. et Wils                                                                 | stem/root bark | Stomach disorders, dyspnea, cough                         | cough, and asthmatic symptoms caused by viral infections. Elimination of pathogens in the pleuro-diaphragmatic interspace. |                                                                                                                                                                                                          |                                                           |
| <i>Tsaoko Amomum fructus</i> ,         | Amomum tsaoko Crevost et Lemaire                                                                   | Fruit          | Abdominal pain, vomiting, Phlegm, malaria                 |                                                                                                                            |                                                                                                                                                                                                          |                                                           |
| <i>Rhizoma Anemarrhenae</i> ,          | Anemarrhena asphodeloides                                                                          | Rhizome        | Fever, cough, stomach pain, renal diseases                |                                                                                                                            |                                                                                                                                                                                                          |                                                           |
| <i>Rhizoma Dioscoreae</i> ,            | Dioscorea opposita Thunb.                                                                          | Rhizome        | Diarrhea, cough, inflammation                             |                                                                                                                            |                                                                                                                                                                                                          |                                                           |
| <i>Radix scutellariae</i> ,            | Scutellariae baicalensis Georgi.                                                                   | Root           | Hepatitis, viral infections, inflammation, liver diseases |                                                                                                                            |                                                                                                                                                                                                          |                                                           |
| <i>Glycyrrhizae radix et rhizome</i> , | <i>Glycyrrhiza uralensis</i> Fisch.,<br><i>Glycyrrhiza inflata</i> , <i>Glycyrrhiza glabra</i> L., | Rhizome        | Phlegm, cough and dyspnea, pain                           |                                                                                                                            |                                                                                                                                                                                                          |                                                           |

**Shufeng Jiedu Capsule**

|                                 |                                                                                       |                   |                                             |                                                                                                                                                                       |                                                                                                                                              |                                                                                                   |
|---------------------------------|---------------------------------------------------------------------------------------|-------------------|---------------------------------------------|-----------------------------------------------------------------------------------------------------------------------------------------------------------------------|----------------------------------------------------------------------------------------------------------------------------------------------|---------------------------------------------------------------------------------------------------|
| <i>Polygonum cuspidatum</i>     | <i>Polygonum cuspidatum</i>                                                           | Root              | Liver diseases, digestive disorders         | Treatment of respiratory infections including pulmonary diseases, flu, and common cold. Possesses antiviral, antibacterial, antitumor and anti-inflammatory potencies | Promotion of anti-inflammatory signaling involving various interleukins and mitogen activated protein kinases as well as by immunoregulation | (Dong et al. 2017)<br>(Liu 2020)<br>(Yang et al. 2017)<br>(He et al. 2017)<br>(Huang et al. 2020) |
| <i>Fructus Forsythiae</i>       | <i>Forsythia suspensa</i> (Thunb. ) Vahl.                                             | fruits            | Heat clearing, detoxification, inflammation |                                                                                                                                                                       |                                                                                                                                              |                                                                                                   |
| <i>Radix isatidis</i> ,         | <i>Isatis indigotica</i> Fort.                                                        | Root              | Sore throat, pain, swelling, fever          |                                                                                                                                                                       |                                                                                                                                              |                                                                                                   |
| <i>Radix bupleuri</i> ,         | <i>Bupleurum chinensis</i> DC. or<br><i>Bupleurum scorzonerifolium</i>                | root              | Viral infections, flu, cold, inflammation   |                                                                                                                                                                       |                                                                                                                                              |                                                                                                   |
| <i>Dahurian patrinia herb</i> , | <i>Patrinia scabiosaeifolia</i> Fisch.                                                | root, whole plant | Heat-clearing, toxicity, pain               |                                                                                                                                                                       |                                                                                                                                              |                                                                                                   |
| <i>Herba Verbena</i>            | European Verbena                                                                      | stalk with herb   | Diuresis, swelling, toxicity                |                                                                                                                                                                       |                                                                                                                                              |                                                                                                   |
| <i>Rhizoma phragmitis</i>       | <i>Phragmites communis</i> (L.) Trin                                                  | rhizome           | Cough, cold, lung inflammation, diurestics  |                                                                                                                                                                       |                                                                                                                                              |                                                                                                   |
| Licorice root                   | <i>Glycyrrhiza uralensis</i> Fisch. ,<br><i>G. inflata</i> Bat.or <i>L. glabra</i> L. | root              | Phlegm, cough, dyspnea, spasm, fever, pain, |                                                                                                                                                                       |                                                                                                                                              |                                                                                                   |

**Pudilan formulation**

|                                |                                         |                   |                                                        |                                                                                                                                                 |                                                                                                                                                                                            |                                                                                                                                |
|--------------------------------|-----------------------------------------|-------------------|--------------------------------------------------------|-------------------------------------------------------------------------------------------------------------------------------------------------|--------------------------------------------------------------------------------------------------------------------------------------------------------------------------------------------|--------------------------------------------------------------------------------------------------------------------------------|
| <i>Taraxacum mongolicum</i>    | <i>Taraxacum mongolicum</i> Hand-Mazz   | leaf, root        | Inflammation, gastrointestinal disorders               | Treatment of acute and chronic inflammation and consequent pathological conditions like pharyngitis, tonsillitis and some respiratory disorders | Inhibition of SARS-CoV-2 replication, anti-SARS-CoV 3CLpro effects, mitigation of pathological damages in lung by attenuating pro-inflammatory mediators including IL-10 and TNF- $\alpha$ | (Kong et al. 2020)<br>(Dong et al. 2015)<br>(Lin et al. 2005)<br>(Liu et al. 2020)<br>(Deng et al. 2020)<br>(Tian et al. 2020) |
| <i>Corydalis bungeana</i> ,    | <i>Corydalis bungeana</i> Turcz.        | leaf, whole plant | Inflammation, respiratory infections, tissue toxicity, |                                                                                                                                                 |                                                                                                                                                                                            |                                                                                                                                |
| <i>Isatis indigotica</i> ,     | <i>Isatis indigotica</i> ,              | roots             | Inflammation, viral infections, cold, fever, pneumonia |                                                                                                                                                 |                                                                                                                                                                                            |                                                                                                                                |
| <i>Scutellaria baicalensis</i> | <i>Scutellariae baicalensis</i> Georgi. | leaf roots,       | Hepatitis, viral infections, liver diseases            |                                                                                                                                                 |                                                                                                                                                                                            |                                                                                                                                |

### Lianhuaqingwen capsule

|                                      |                                                                                                  |               |                                                                                               |                                                                                                    |                                                                                                                                                                                                                                           |
|--------------------------------------|--------------------------------------------------------------------------------------------------|---------------|-----------------------------------------------------------------------------------------------|----------------------------------------------------------------------------------------------------|-------------------------------------------------------------------------------------------------------------------------------------------------------------------------------------------------------------------------------------------|
| <i>Lonicera japonica</i>             | <i>Lonicera japonica</i> var. <i>japonica</i>                                                    | leaf, flower  | Fever, cold, headache, inflammation                                                           | Treatment of influenza and other viral infections, respiratory disorders and for immune regulation | Antagonizing SARS-CoV-2 spike protein, blocking of virus binding with ACE, inhibition of viral replication, amelioration of respiratory tract injury via anti-oxidant, antiapoptotic mechanisms and suppression of inflammatory mediators |
| <i>Forsythia suspense</i>            | <i>Forsythia suspensa</i> (Thunb.) Vahl.                                                         | flower/fruit  | Heat-clearing, sore throat, cold                                                              |                                                                                                    |                                                                                                                                                                                                                                           |
| <i>Pogostemon cablin</i>             | <i>Pogostemon cablin</i> (Blanco) Benth.                                                         | Shoot part    | Nausea, vomiting, diarrhea, gas-inflammation, viral/bacterial diseases cold, cough, pneumonia |                                                                                                    |                                                                                                                                                                                                                                           |
| <i>Rhodiola rosea</i>                | <i>Rhodiola rosea</i>                                                                            | bark,         | fever, stomach infection, edema                                                               |                                                                                                    |                                                                                                                                                                                                                                           |
| <i>Radix et Rhizoma Rhei</i>         | <i>Rheum palmatum</i> L., <i>R. tanguticum</i> Maxim.ex. Balf., <i>R. officinale</i> Baill       | root,         |                                                                                               |                                                                                                    |                                                                                                                                                                                                                                           |
| <i>Herba ephedrae</i> ,              | <i>Ephedra sinica</i> Stapf., <i>E. equisetina</i> Bge., <i>E. intermedia</i> Schrenket CA. Mey. | Grass stem    | Dyspnea, cough, promote urination                                                             |                                                                                                    |                                                                                                                                                                                                                                           |
| <i>Radix et Rhizoma glycyrrhizae</i> | <i>Glycyrrhiza uralensis</i> Fisch., <i>Glycyrrhiza inflata</i> , <i>Glycyrrhiza glabra</i> L.,  | Root, Rhizome | Phlegm, cough, dyspnea, pain                                                                  |                                                                                                    |                                                                                                                                                                                                                                           |
| <i>Radix isatidis</i> ,              | <i>Isatis indigotica</i> Fort.                                                                   | Root          | Sore throat, pain, swelling, fever                                                            |                                                                                                    |                                                                                                                                                                                                                                           |
| <i>Semen armeniacae amarum</i> ,     | <i>Prunus armeniaca</i> L., <i>P. sibirica</i> L.                                                | Seed          | Cough, dyspnea, gastrointestinal disorders                                                    |                                                                                                    |                                                                                                                                                                                                                                           |
| <i>Rhizoma Dryopteridis</i>          | <i>P. mandshurica</i> ,                                                                          |               |                                                                                               |                                                                                                    |                                                                                                                                                                                                                                           |
| <i>Crassirhizomatis</i>              | <i>Dryopteris crassirhizoma</i> Nakai                                                            | Rhizome       | Hemorrhage, Menorrhagia, toxicity, fever, common cold                                         |                                                                                                    |                                                                                                                                                                                                                                           |
| <i>Herba Houptuyniae</i>             | <i>Houttuynia cordata</i> Thunb                                                                  | Aerial        | Fever, abscess, toxicity, sores, cough                                                        |                                                                                                    |                                                                                                                                                                                                                                           |

**Table 2: Indian Ayurvedic Medicine and COVID-19**

| Medicinal Plant                            | Common Name                        | Part(s) in Use | Ethnomedicinal Indication                                                                                           | Use of herbal composition                                                                                                                 | Anti-Covid-19 Mechanisms | Ref                        |
|--------------------------------------------|------------------------------------|----------------|---------------------------------------------------------------------------------------------------------------------|-------------------------------------------------------------------------------------------------------------------------------------------|--------------------------|----------------------------|
| <b>Sudarsana Churna herbal composition</b> |                                    |                |                                                                                                                     |                                                                                                                                           |                          |                            |
| Swertia Chirata 2016)                      | Chiretta                           | Whole plant,   | Body weakness, pain, fever, cough, asthma, inflammation                                                             | Treatment of malaria, cold, fever and associated symptoms like fatigue, anorexia and dyspepsia, as well as viral infections and diabetes. | Not Available            | (Kumar and Van Staden)     |
|                                            |                                    | Root           | mmatory disorders, common cold hypertension, headaches, gastrointestinal disorders                                  |                                                                                                                                           |                          | (Bhargava 2008)            |
| <i>Trichosanthes dioica</i> Roxb.          | Pointed gourd leaf                 | Leaf, juice,   | Wound, fever, edema, febrifuge, hair loss                                                                           |                                                                                                                                           |                          | (Weerakoon et al. 2018)    |
| <i>Uraria picta</i> (Jacq.) Desv.          | Indian Uraria, slight-of-hand herb | leaf           | Microbial infection, cough, poison, fever                                                                           |                                                                                                                                           |                          | (Oyesiku et al. 2013)      |
| <i>Legenaria siceraria</i> (Mol) Standl    | Bottle gourd                       | Fruit          | Ulcer, fever, asthma, cough diabetes, hyperlipidemia, inflammation, heart and liver diseases, stress                |                                                                                                                                           |                          |                            |
| <i>Naregamia alata</i>                     | Goanese Ipecacuanh,                | Whole plant    | Fever, malaria, asthma, throat congestion spleen disease, anemia, emetic                                            |                                                                                                                                           |                          |                            |
| <i>Piper nigrum</i>                        | Goanese Ipecac                     | Fruit          | Inflammation, pain, fever, immune dysfunction, spasm, bacterial, fungal infection, anxiolytic, hypertension, cancer |                                                                                                                                           |                          | (Damanhour and Ahmad 2014) |
| <i>Piper longum</i>                        | Long pepper                        | Fruit          | Constipation, asthma, diarehea, malaria, viral infections, respiratory infections, cough, bronchitis                |                                                                                                                                           |                          | (Kumar et al. 2011)        |
| <i>Glycyrrhiza glabra</i> L.               |                                    | Rhizome        | Phlegm, cough and dyspnea, pain                                                                                     |                                                                                                                                           |                          |                            |
| <i>Azadirachta indica</i> A. Juss          | Neem                               | Bark           | Asthma, cough, intestinal disorders, wound, phlegm, leprosy                                                         |                                                                                                                                           |                          |                            |

|                                                      |                                            |                                    |                                                                                                                                         |                                |
|------------------------------------------------------|--------------------------------------------|------------------------------------|-----------------------------------------------------------------------------------------------------------------------------------------|--------------------------------|
| <i>Inula racemosa</i>                                | Elecampane                                 | Root, rhizome                      | Cough, throat congestion, sexual dysfunction, microbial infections                                                                      |                                |
| <i>Terminalia bellirica</i>                          | Beleric myrobalan                          | Whole plant, fruit                 | Asthma, bronchitis, cough, hepatitis, diarrhea, dyspepsia, laxative                                                                     | (Gupta et al. 2020)            |
| <i>Marsdemia tenacissima</i> (Roxb.) Moon.           | Rajmahal hemp                              | Root, stem                         | Cancer, infertility asthma, bronchitis, sore throat, cystitis, pneumonia, poisoning                                                     | (Wang et al. 2018)             |
| <i>Embilica officinale</i> Gaerth.                   | Indian gooseberry                          | Fruit, leaf                        | Amnesia, scurvy, viral infections, fungal infections, cough, asthma, nausea, fever, diarrhea, constipation                              | (Variya et al. 2016)           |
| <i>Tinospora cordifolia</i>                          | Heart-leaved moon-seed                     | Root, stem, leaf                   | Inflammation, dyspepsia, urinary infection, fever, heart diseases, allergy, jaundice,                                                   | (Antul et al. 2019)            |
| <i>Picrorhiza kurroa</i> Benth. ,                    | Kutki                                      | Root, rhizome                      | Microbial infections, immunomodulatory, dyspepsia, inflammation, fever, liver diseases, cholesterol gallstones                          | (Debnath et al. 2020)          |
| <i>Plumbago zeylanica</i> Linn.                      | Ceylon leadwort, doctorbush, wild leadwort | Root, leaf,                        | Diarrhea, bacterial infections, abdominal discomforts, fever, inflammation, pain, ulcer, piles, sexual enhancement                      | (Mandavkar and Jalalpure 2011) |
| <i>Moringa oleifera</i> Lam.                         | Horseradish tree, drumstick tree           | Seed,                              | Anemia, microbial infection, cancer, bronchitis, fever, heart disease, hypertension, diabetes, diarrhea, gout                           | (Paikra et al. 2017)           |
| <i>Asparagus racemosus</i> Willd.                    | Wild Asparagus                             | Root                               | Feminine hormonal issue, inflammation, immune dysfunction, gastric ulcers, indigestion, liver diseases                                  |                                |
| <i>Berberis aristata</i> DC.                         | Indian barberry                            | Fruit, root                        | Fever, body pain, weak immune system, jaundice, inflammation, microbial infection, , cancer,                                            |                                |
| <i>Didymocarpus pedicellata</i> R.Br. (Gesneriaceae) | Stone flower,                              | Leaf                               | Renal diseases, kidney stone                                                                                                            |                                |
| <i>Nelumbo nucifera</i>                              | Indian lotus, sacred lotus                 | Rhizome, seed,                     | Fever, gallstones, microbial infection, neurotropic, piles, heart disease, dysentery, diabetes                                          |                                |
| <i>Pinus roxburghii</i> 2011)                        | Sargent chir pine,                         | Bark, resin                        | Dyslipidemia, parasitic worm infestations, edema,                                                                                       | (Rawat and Vashistha 2011)     |
| <i>Andropogon muricatus</i> Retz.                    | longleaf Indian pine                       |                                    | rheumatism, ulcer, bronchitis                                                                                                           | (Singh et al. 2011)            |
| <i>Cinnamomum cassia</i> Presl.                      | Vetiver, Khus-khus, Chinese Cassia         | Grass stem, root<br>Leaf, twig oil | Allergy, perfume, spasm, diuretic, fever.<br>Flatulence, body pain, fungal infection, inflammation, diabetes, compromised immune system | (Singh et al. 2011)            |
| <i>Cinnamomum iners</i> Reinw.ex Blume Wild          | Cinnamon                                   | Leaf, bark                         | Flatulence, appetizer, , inflammatory arthritis, edema, fever, kidney diseases                                                          | (Singh et al. 2011)            |
| <i>Desmodium gangeticum</i> DC.                      | Shal Leafed Bush                           | Root, leaf                         | Flatulence, fever, rheumatism, cough, throat congestion, obstructed skin/ducts pore, snake bite, scorpion sting                         | (Rastogi et al. 2011)          |
| <i>Jateorrhiza palmata</i> Linn.                     | Calumba                                    | Root                               | Diarrhea, abdominal pain, fever, emesis, nausea, indigestion, dyspepsia hypertension, bronchitis                                        |                                |
| <i>Curcuma longa</i> Linn.                           | Turmeric                                   | Root                               | Microbial infection, gastric ulcer, inflammatory disorders, diabetics, liver disorders, cancer                                          |                                |
| <i>Cedrus deodara</i>                                | <i>Deodar cedar</i>                        | Wood, oil,<br>leaf                 | Flatulence, renal diseases, fever, heart palpitation<br>pulmonary trouble, urinary diseases, pain                                       | (Sinha 2019)                   |
| <i>Acorus calamus</i> L.                             | Sweet flag,                                | Rhizome, oil                       | Flatulence, cough, fever, piles, asthma, microbial, infection, dyspepsia                                                                |                                |
| <i>Desmodium triflorum</i> DC.                       | Threeflower ticktrefoil,                   | Whole plant, leaf                  | Flatulence, ulcer, burns, itching, diarrhea, cataracts, rheumatism, worms infection, microbial infection, inflammation, convulsion      |                                |
| <i>Terminalia chebula</i>                            | Chebulic myrobalan                         | Fruit                              | Appetizer, indigestion, liver ailment, stomachic, gastrointestinal disorders, cough,                                                    |                                |

|                                                                       |                                                  |                         |                                                                                                                                                                                  |                                                                                             |                                   |
|-----------------------------------------------------------------------|--------------------------------------------------|-------------------------|----------------------------------------------------------------------------------------------------------------------------------------------------------------------------------|---------------------------------------------------------------------------------------------|-----------------------------------|
| <i>Alhagi pseudalhagi</i> Bieb. Desv                                  | Camelthorn, Persian manna plant                  | Leaf, flower, root stem | Ulcer, rheumatic pains, bilharziasis, gastrointestinal discomforts, urinary tract infections, liver diseases                                                                     |                                                                                             | (Srivastava et al. 2014 )         |
| <i>Rhus succedanea</i> L.                                             | Wax tree                                         | Leaf, fruit             | Antioxidant,, fever, eye infection, cancer, pulmonary tuberculosis                                                                                                               |                                                                                             |                                   |
| <i>Solanum xanthocarpum</i> Schrad & Wendl                            | Yellow fruit night-shade                         | Fruit, Root             | Asthma, cough, erectile dysfunction, fever, obesity, worm infestation, whitlow, diabetes                                                                                         |                                                                                             |                                   |
| <i>Zingiber officinale</i> Wild Rosc.                                 | Ginger                                           | Root                    | Vomiting, cough, inflammation, nausea, gastrointestinal disorders, spasm                                                                                                         |                                                                                             | (Mbaveng and Kuete 2017)          |
| <i>Trachyspermum ammi</i> (L.) Sprague / <i>Ptychotis coptica</i> DC. | Bishop`s weed                                    | Fruit                   | Sore throat, psoriasis, muscle spasm, microbial infection, bronchitis, flatulence, worm infestation                                                                              |                                                                                             |                                   |
| <i>Aconitum heterophyllum</i> Wall.                                   | Indian Ateesh`                                   | Root                    | Inflammation, urinary infection, diarrhea, dysentery, microbial infection, liver disease                                                                                         |                                                                                             | (Paramanick et al. 2017)          |
| <i>Aegle marmelos</i> (L.) Correa                                     | Indian bael                                      | Fruit, root, bark       | Diarrhea, bacterial infection, viral infection, pain, fever, malaria, inflammation, antihyperlipidaemic, dysentery, cancer,                                                      |                                                                                             | (Rahman and Parvin 2014)          |
| <i>Holarrhena antidysenterica</i> Wall. ex.A.DC                       |                                                  | Bark, seed              | Diarrhea, dysentery, amebiasis, anemia, blood disorders, fever, skin disorders                                                                                                   |                                                                                             | (Jamadagni et al. 2017)           |
| <i>Pavonia odorata</i> Willd.                                         | Fragrant swamp mallow                            | Rhizome                 | Fever, skin disorder, herpes, pain, intestinal hemorrhage, dysentery, inflammation                                                                                               |                                                                                             | (Nakhare and Garg 1992)           |
| <i>Hedychium spicatum</i> Ham.                                        | Spiked ginger lily                               | Rhizome                 | Hypertension, flatulence, digestive disorders, vomiting, diarrhea, inflammation, respiratory infections, bronchitis, pain, fever, snake bite, foul breath, microbial infections, |                                                                                             | (Rasool and Maqbool 2019)         |
| <b>Dhanwantara Gutika herbal composition</b>                          |                                                  |                         |                                                                                                                                                                                  |                                                                                             |                                   |
| <i>Elettaria cardamomum</i>                                           | Green cardamom                                   | Seed                    | Digestive system disorders, ulcer, vomiting, cough, asthma, respiratory infections, cold, diuretic                                                                               | Treatment of respiratory diseases, including cold, cough and asthma. Relieves, inflammation | Not Available (Joomy et al. 2019) |
| <i>Zingiber officinale</i> Wild Rosc.                                 | Ginger                                           | Root                    | Vomiting, cough, nausea, gastrointestinal disorders, inflammation, spasm                                                                                                         | arthritis, sprain, flatulence and bloating                                                  | (Mbaveng and Kuete 2017)          |
| <i>Terminalia chebula</i>                                             | Chebulic myrobalan                               | Fruit                   | Indigestion, liver ailment, stomachic, gastrointestinal disorders, cough, appetizer,                                                                                             |                                                                                             |                                   |
| <i>Myristica fragrans</i> Houtt.                                      | Nutmeg                                           | Seed                    | Sexual dysfunction, indigestion, flatulence, neurostimulant                                                                                                                      |                                                                                             |                                   |
| <i>Solanum indicum</i>                                                | Poison Berry, Indian Nightshade African eggplant | Roots, Berries          | Diuretic, bronchitis, asthma, cough, pain, wound                                                                                                                                 |                                                                                             |                                   |
| <i>Swertia chirata</i>                                                | Chirretta                                        | Whole plant, Root       | Body weakness, pain, fever, cough, asthma, common cold inflammatory disorders, hypertension, headaches, gastrointestinal disorders                                               |                                                                                             | (Kumar and Van Staden 2015)       |
| <i>Cuminum cyminum</i>                                                | Cumin                                            | Seed                    | Digestive disorders, diuretic, pain, ulcer                                                                                                                                       |                                                                                             |                                   |
| <i>Syzygium aromaticum</i>                                            | Clove                                            | Flower                  | Skin disorders, respiratory infections, digestive disorders                                                                                                                      |                                                                                             |                                   |
| <i>Piper cubeba,</i>                                                  | Cubeb, tailed pepper                             | Fruit                   | Cough, swelling, dysmenorrhea, erectile dysfunction                                                                                                                              |                                                                                             |                                   |
| <i>Andrographis paniculata</i>                                        | Java pepper Creat, green chiretta                | Leaf, juice             | Hypertension, skin diseases, viral infections, bronchitis, ulcer, skin diseases, flatulence, dysentery, liver diseases, malaria                                                  |                                                                                             | (Okhuarobo et al. 2014)           |
| <i>Elaeocarpus ganitrus</i>                                           | Seed                                             |                         | Hypertension, diabetes, asthma, chronic cough, fever tension, viral infections, bacterial infections, cardiovascular diseases, heart diseases, cancer                            |                                                                                             |                                   |
| <i>Cedrus deodara</i>                                                 | Deodar cedar                                     | Wood, oil,              | Flatulence, renal diseases, fever, heart palpitation                                                                                                                             |                                                                                             | (Sinha 2019)                      |

|                                               |                   |                          |                                                                                                                                                                         |                                                                                                   |               |                            |
|-----------------------------------------------|-------------------|--------------------------|-------------------------------------------------------------------------------------------------------------------------------------------------------------------------|---------------------------------------------------------------------------------------------------|---------------|----------------------------|
| <i>Cinnamomum camphora</i>                    | Camphor tree,     | leaf<br>Seed, leaf, stem | pulmonary trouble, urinary diseases, pain<br>Bacterial infection, bronchitis, inflammation, congestion, cough, cold edema, and cold, skin diseases, digestive disorders |                                                                                                   |               | (Satyal et al. 2013)       |
| <i>Trachyspermum roxburghianum</i>            | Wild celery       | Seed, leaf               | Gastrointestinal disorders, inflammation, pain, rheumatism, cough, cold, arthritis,                                                                                     |                                                                                                   |               |                            |
| <b>Talisadi Churna herbal composition</b>     |                   |                          |                                                                                                                                                                         |                                                                                                   |               |                            |
| <i>Abbies webbiana</i>                        | Indian Silver Fir | Leaf                     | Cough, asthma, chronic bronchitis, fever, sore throat, respiratory infection, body pain, diarrhea, menstrual pain                                                       | Treatment of inflammatory conditions and respiratory tract infections including cough, bronchitis | Not Available | (Ghosh et al. 2010)        |
| <i>Piper nigrum</i>                           | Black pepper      | Fruit                    | Inflammation, pain, fever, immune dysfunction, bacterial infection, fungal infection, spasm, anxiolytic, hypertension, cancer                                           | caused by viruses and other pathogens. Also used for the treatment                                |               | (Damanhour and Ahmad 2014) |
| <i>Zingiber officinale</i> Wild Rosc.         | Ginger            | Root                     | Vomiting, cough, inflammation, nausea, gastrointestinal disorders, spasm                                                                                                | digestive disorders like flatulence                                                               |               | (Mbaveng and Kuete 2017)   |
| <i>Piper longum</i>                           | long pepper       | Fruit                    | Constipation, asthma, diarrhea, malaria, viral infections, respiratory infections, cough, bronchitis                                                                    | dyspepsia                                                                                         |               | (Kumar et al. 2011)        |
| <i>Bambusa arundinacea</i> Retz.<br>(Poaceae) | Bamboo Manna      | Leaf                     | Cough, fever, inflammatory diseases, leprosy, microbial infections, infertility                                                                                         |                                                                                                   |               | (Soni et al. 2012)         |
| <i>Elettaria cardamomum</i>                   | Green Cardamom    | Seed                     | Digestive system disorders, ulcer vomiting respiratory infections, cough, asthma, cold, detoxicant, diuretic                                                            |                                                                                                   |               |                            |
| <i>Cinnamomum zeylanicum</i>                  | True Cinnamomum   | Seed, leaf, stem         | Respiratory diseases, digestive disorders and gynaecological ailments                                                                                                   |                                                                                                   |               | (Ranasinghe et al. 2013).  |

**Table 3: African Traditional Medicine and COVID-19**

| Medicinal Plant                                           | Common Name               | Part(s) in Use | Ethnomedicinal Indication                                                           | Use of herbal composition                                                                  | Anti-Covid-19 Mechanisms | Ref                                                |
|-----------------------------------------------------------|---------------------------|----------------|-------------------------------------------------------------------------------------|--------------------------------------------------------------------------------------------|--------------------------|----------------------------------------------------|
| <b>Nigerian Herbal Recipe A</b>                           |                           |                |                                                                                     |                                                                                            |                          |                                                    |
| <i>Allium sativum L.</i>                                  | Garlic                    | Bulb           | Respiratory problems, constipation, parasitic infestation, snake bite, insect bites | Treatment of respiratory infections including common cold, cough, and with largely unknown | Not Available            | (Bayan et al. 2014)                                |
| <i>Allium cepa L.</i>                                     | Onion                     | Bulb           | Inflammation, diabetes, obesity, hypertension                                       |                                                                                            |                          | (Teshika et al. 2019)<br>(Mbaveng and Kuete 2017)  |
| <i>Zingiber officinale</i>                                | Ginger                    | Root           | Vomiting, nausea, gastrointestinal disorders, antispasmodic                         | mecahnisms                                                                                 |                          | (Sonibare and Gbile 2008)<br>(Kamatou et al. 2011) |
| <i>Piper guineense</i>                                    | West African black pepper | Fruit          | Flatulence, indigestion, respiratory infections, rheumatism, and syphilis           |                                                                                            |                          |                                                    |
| <i>Adansonia digitata L.</i><br>(Malvaceae)               | Baobab fruit              | Fruit          | Fever, diarrhea, malaria, inflammation, asthma                                      |                                                                                            |                          |                                                    |
| <b>Nigerian Herbal Recipe B</b>                           |                           |                |                                                                                     |                                                                                            |                          |                                                    |
| <i>Newbouldia laevis</i> (P. Beauv.)<br>Seeman ex Bureau. | Boundary tree             | Leaf           | Fever, coughs, constipation, malaria, sexually transmitted disease                  | Most of the plants are used for the treatment                                              | Not Available            | (Akerere et al. 2011)                              |
| <i>Azadirachta indica (A. indica)</i>                     | Neem                      | Leaf, seed     | Asthma, cough, intestinal disorders, wo-                                            | of respiratory infections                                                                  |                          | (Sonibare and Gbile 2008)                          |

|                                   |                          |               |                                                                                                     |                                                                                                         |               |                                                                       |
|-----------------------------------|--------------------------|---------------|-----------------------------------------------------------------------------------------------------|---------------------------------------------------------------------------------------------------------|---------------|-----------------------------------------------------------------------|
| A. Juss                           |                          |               | und, phlegm, leprosy                                                                                |                                                                                                         |               |                                                                       |
| <i>Allium cepa</i>                | Onion                    | Bulb          | Inflammation, diabetes, obesity, hyperdysentery, diarrhea, asthma, diabetes, malaria                |                                                                                                         |               |                                                                       |
| <i>Anchomanes difformis</i>       | Forest anchomanes, Blume | Leaf, rhizome |                                                                                                     |                                                                                                         |               | (Aladesanmi 2006)                                                     |
| <i>Tetrapleura tetraptera</i>     | Aidan fruit              | Fruit         | Inflammatory disorders, asthma, diabetes mellitus, hypertension, epilepsy                           |                                                                                                         |               | (Ojewole and Adewunmi 2004)                                           |
| <i>Xylopi aethiopic a</i>         | African pepper           | Fruit         | Bronchitis, asthma, stomach-aches, infertility, diarrhea, gastrointestinal disorders                |                                                                                                         |               |                                                                       |
| <i>Vernonia amygdalina</i>        | Bitter leaf              | Leaf          | Malaria, inflammation, diabetes, wounds, hypertension, jaundice, diabetes                           |                                                                                                         |               | (Oyeyemi et al. 2018)                                                 |
| <b>Nigerian Herbal Recipe C</b>   |                          |               |                                                                                                     |                                                                                                         |               |                                                                       |
| <i>Cymbopogon citratus</i>        | Lemongrass               | Grassy leaf   | Inflammation, pain, fever, anxiety, tension, nausea, vomiting, gastrointestinal disorders, diuresis | Not Available                                                                                           | Not Available | (Oladeji et al. 2019)                                                 |
| <i>Citrus aurantifolia</i>        | Lime                     | Leaf, fruit   | Inflammation, anxiety, oxidative stress, diabetes, obesity, microbial infections                    |                                                                                                         |               |                                                                       |
| <i>Azadirachta indica A. Juss</i> | Neem,                    | Leaf, seed    | Asthma, cough, intestinal disorders, wound, Phlegm, leprosy                                         |                                                                                                         |               |                                                                       |
| <i>Mangifera indica</i>           | Mango                    | Leaf, bark    | Cough, asthma, bronchitis, diarrhea, rheumatism, insomnia, edema, anxiety, tension                  |                                                                                                         |               | (Shah et al. 2010)                                                    |
| <i>Carica papaya</i>              | Pawpaw                   | Leaf, fruit   | Dysentery, fever, piles, asthma, wound, anxiety, flatulence, sexually transmitted diseases          |                                                                                                         |               | (Vij and Prashar 2015)                                                |
| <i>Citrus limon</i>               | Lemon                    | Leaf, fruit   | Scurvy, cold, cough, hypertension, obesity                                                          |                                                                                                         |               | (Klimek-Szczykutowicz et al. 2020)                                    |
| <i>Zingiber officinale</i>        | Ginger                   | Root          | Vomiting, nausea, gastrointestinal disorders, spasm                                                 |                                                                                                         |               |                                                                       |
| <b>Jobelyn Formulation</b>        |                          |               |                                                                                                     |                                                                                                         |               |                                                                       |
| <i>Sorghum bicolor</i>            | Sweet millet             | Seed          | Blood tonic, bronchitis, pulmonary congestion, cough, diarrhea                                      | Treatment of anemia and antiviral infection, immune modulation and upregulation of antiviral chemokines | Not Available | (Nwinyi et al. 2009)<br>(Ayuba et al. 2014)                           |
| <b>Covid-Organics Formulation</b> |                          |               |                                                                                                     |                                                                                                         |               |                                                                       |
| <i>Artemisia annua L.</i>         | Sagebrush                | Aerial parts  | Nausea, vomiting, fever, malaria,                                                                   |                                                                                                         |               |                                                                       |
| Other Malagasy plants:            | NA                       | NA            | NA                                                                                                  |                                                                                                         |               | Artemisia is used in the treatment of malaria, fever and inflammation |

## References

Akerele J, Ayinde B, Ngiagah J (2011) Phytochemical and Antibacterial Evaluations of the Stem Bark of *Newbouldia laevis* against Isolates from Infected Wounds and Eyes. *Tropical Journal of Pharmaceutical Research* 10: 211-218 [https://doi.org/DOI: 10.4314/tjpr.v10i2.66566](https://doi.org/DOI:10.4314/tjpr.v10i2.66566)

Aladesanmi AJ (2006) *Tetrapleura tetraptera*: molluscicidal activity and chemical constituents. *African journal of traditional, complementary, and alternative medicines : AJTCAM* 4: 23-36.

Ang L, Lee HW, Kim A, Lee JA, Zhang J, Lee MS (2020) Herbal medicine for treatment of children diagnosed with COVID-19: A review of guidelines. *Complementary Therapies in Clinical Practice* 39: 101174 <https://doi.org/https://doi.org/10.1016/j.ctcp.2020.101174>.

Antul K, Amandeep P, Gurwinder S, Anuj C (2019) Review on Pharmacological Profile of Medicinal Vine: *Tinospora cordifolia* *Current Journal of Applied Science and Technology*, 35: 1-11 <https://doi.org/https://doi.org/10.9734/cjast/2019/v35i530196>.

Ayuba GI, Jensen GS, Benson KF, Okubena AM, Okubena O (2014) Clinical efficacy of a West African sorghum bicolor-based traditional herbal preparation Jobelyn shows increased hemoglobin and CD4+ T-lymphocyte counts in HIV-positive patients. *Journal of alternative and complementary medicine (New York, N.Y.)* 20: 53-56 <https://doi.org/10.1089/acm.2013.0125>.

Bayan L, Koulivand PH, Gorji A (2014) Garlic: a review of potential therapeutic effects. *Avicenna journal of phytomedicine* 4: 1-14.

Bhargava S (2008) "Evaluation of Antimicrobial Potential of Sudarshan Churna: A Polyherbal Formulation". *iums-ijpt* 7: 185-180.

Chen J, Wang Y-k, Gao Y, Hu L-S, Yang J-w, Wang J-r, Sun W-j, Liang Z-q, Cao Y-m, Cao Y-b (2020) Protection against COVID-19 injury by qingfei paidu decoction via anti-viral, anti-inflammatory activity and metabolic programming. *Biomedicine & Pharmacotherapy* 129: 110281 <https://doi.org/https://doi.org/10.1016/j.biopha.2020.110281>.

Chiang H-M, Chen H-C, Wu C-S, Wu P-Y, Wen K-C (2015) *Rhodiola* plants: Chemistry and biological activity. *Journal of Food and Drug Analysis* 23: 359-369 <https://doi.org/https://doi.org/10.1016/j.jfda.2015.04.007>.



Damanhoury Z, Ahmad A (2014) A Review on therapeutic potential of *Piper nigrum* L. (Black Pepper): The king of spices. *Medicinal and Aromatic Plants* 3 <https://doi.org/10.4172/2167-0412.1000161>.

Debnath P, Rathore S, Walia S, Kumar M, Devi R, Kumar R (2020) *Picrorhiza kurroa*: a promising traditional therapeutic herb from higher altitude of western Himalayas. *Journal of Herbal Medicine* 23: 100358 <https://doi.org/10.1016/j.hermed.2020.100358>.

Deng W, Xu Y, Kong Q, Xue J, Yu P, Liu J, Lv Q, Li F, Wei Q, Bao L (2020) Therapeutic efficacy of Pudilan Xiaoyan Oral Liquid (PDL) for COVID-19 in vitro and in vivo. *Signal Transduction and Targeted Therapy* 5: 66 <https://doi.org/10.1038/s41392-020-0176-0>.

Dong Z-B, Zhang Y-H, Zhao B-J, Li C, Tian G, Niu B, Qi H, Feng L, Shao J-G (2015) Screening for anti-inflammatory components from *Corydalis bungeana* Turcz. based on macrophage binding combined with HPLC. *BMC complementary and alternative medicine* 15: 363-363 <https://doi.org/10.1186/s12906-015-0907-x>.

Dong Z, Lu X, Tong X, Dong Y, Tang L, Liu M (2017) *Forsythiae Fructus*: A Review on its Phytochemistry, Quality Control, Pharmacology and Pharmacokinetics. *Molecules (Basel, Switzerland)* 22: 1466 <https://doi.org/10.3390/molecules22091466>.

Ghosh AK, Sen D, Bhattacharya S (2010) A new alkaloid isolated from *Abies webbiana* leaf. *Pharmacognosy research* 2: 186-189 <https://doi.org/10.4103/0974-8490.65516>.

Gupta A, Kumar R, Bhattacharyya P, Bishayee A, Pandey AK (2020) *Terminalia bellirica* (Gaertn.) roxb. (Bahera) in health and disease: A systematic and comprehensive review. *Phytomedicine* 77: 153278 <https://doi.org/10.1016/j.phymed.2020.153278>.

He X, Luan F, Zhao Z, Ning N, Li M, Jin L, Chang Y, Zhang Q, Wu N, Huang L (2017) The Genus *Patrinia*: A Review of Traditional Uses, Phytochemical and Pharmacological Studies. *The American Journal of Chinese Medicine* 45: 637-666 <https://doi.org/10.1142/S0192415X17500379>.

Hsieh CF, Lo CW, Liu CH, Lin S, Yen HR, Lin TY, Horng JT (2012) Mechanism by which ma-xing-shi-gan-tang inhibits the entry of influenza virus. *J Ethnopharmacol* 143: 57-67  
<https://doi.org/10.1016/j.jep.2012.05.061>.

Hu K, Guan W-J, Bi Y, Zhang W, Li L, Zhang B, Liu Q, Song Y, Li X, Duan Z, Zheng Q, Yang Z, Liang J, Han M, Ruan L, Wu C, Zhang Y, Jia Z-H, Zhong N-S (2020) Efficacy and safety of Lianhuaqingwen capsules, a repurposed Chinese herb, in patients with coronavirus disease 2019: A multicenter, prospective, randomized controlled trial. *Phytomedicine : international journal of phytotherapy and phytopharmacology*: 153242-153242  
<https://doi.org/10.1016/j.phymed.2020.153242>.

Huan-Tian Cui Y-TL, Li-Ying Guo, Xiang-Guo Liu, Lu-Shan Wang, Jian-Wei Jia, Jia-Bao Liao, Jing Miao, Zhai-Yi Zhang, Li Wang, Hong-Wu Wang, Wei-Bo Wen (2020) Traditional Chinese medicine for treatment of coronavirus disease 2019: a review. *Traditional Medicine Research* 5: 65-73  
<https://doi.org/10.12032/tmr20200222165>.

Huang Y-F, Bai C, He F, Xie Y, Zhou H (2020) Review on the potential action mechanisms of Chinese medicines in treating Coronavirus Disease 2019 (COVID-19). *Pharmacological Research* 158: 104939  
<https://doi.org/10.1016/j.phrs.2020.104939>.

Jamadagni PS, Pawar SD, Jamadagni SB, Chougule S, Gaidhani SN, Murthy SN (2017) Review of *Holarrhena antidysenterica* (L.) Wall. ex A. DC.: Pharmacognostic, Pharmacological, and Toxicological Perspective. *Pharmacognosy reviews* 11: 141-144  
[https://doi.org/10.4103/phrev.phrev\\_31\\_16](https://doi.org/10.4103/phrev.phrev_31_16).

Joomy J, Priya V, Ponnulakshmi R, Gayathri R, Madhan K, Shyamaladevi B, Manikannann M, Selvaraj J (2019) Studies on antifungal properties of Talisadi Churna on human pathogens *Drug Invention Today* 11: 1071-1073.

Kamatou GPP, Vermaak I, Viljoen AM (2011) An updated review of *Adansonia digitata*: A commercially important African tree. *South African Journal of Botany* 77: 908-919  
<https://doi.org/10.1016/j.sajb.2011.08.010>.

Klimek-Szczykutowicz M, Szopa A, Ekiert H (2020) Citrus limon (Lemon) Phenomenon-A Review of the Chemistry, Pharmacological Properties, Applications in the Modern Pharmaceutical, Food, and Cosmetics Industries, and Biotechnological Studies. *Plants* (Basel, Switzerland) 9: 119 <https://doi.org/10.3390/plants9010119>.

Kong Q, Wu Y, Gu Y, Lv Q, Qi F, Gong S, Chen X (2020) Analysis of the molecular mechanism of Pudilan (PDL) treatment for COVID-19 by network pharmacology tools. *Biomedicine & Pharmacotherapy* 128: 110316 <https://doi.org/10.1016/j.biopha.2020.110316>.

Kumar S, Kamboj J, Suman, Sharma S (2011) Overview for Various Aspects of the Health Benefits of Piper Longum Linn. Fruit. *Journal of Acupuncture and Meridian Studies* 4: 134-140 [https://doi.org/10.1016/S2005-2901\(11\)60020-4](https://doi.org/10.1016/S2005-2901(11)60020-4).

Kumar V, Van Staden J (2015) A Review of *Swertia chirayita* (Gentianaceae) as a Traditional Medicinal Plant. *Frontiers in pharmacology* 6: 308 <https://doi.org/10.3389/fphar.2015.00308>.

Kumar V, Van Staden J (2016) A Review of *Swertia chirayita* (Gentianaceae) as a Traditional Medicinal Plant. *Frontiers in pharmacology* 6: 308-308 <https://doi.org/10.3389/fphar.2015.00308>.

Lin C-W, Tsai F-J, Tsai C-H, Lai C-C, Wan L, Ho T-Y, Hsieh C-C, Chao P-DL (2005) Anti-SARS coronavirus 3C-like protease effects of *Isatis indigotica* root and plant-derived phenolic compounds. *Antiviral Research* 68: 36-42 <https://doi.org/10.1016/j.antiviral.2005.07.002>.

Liu C-x (2020) Pay attention to situation of SARS-CoV-2 and TCM advantages in treatment of novel coronavirus infection. *Chinese Herbal Medicines* 12: 97-103 <https://doi.org/10.1016/j.chmed.2020.03.004>.

Liu H, Ye F, Sun Q, Liang H, Li C, Lu R, Huang B, Tan W, Lai L (2020) *Scutellaria baicalensis* extract and baicalein inhibit replication of SARS-CoV-2 and its 3C-like protease *in vitro*. *bioRxiv*: 2020.2004.2010.035824 <https://doi.org/10.1101/2020.04.10.035824>.

Mandavkar Y, Jalalpure S (2011) A comprehensive review on *Plumbago zeylanica* Linn African Journal of Pharmacy and Pharmacology 5: 2738-2747 [https://doi.org/DOI: 10.5897/AJPP11.739](https://doi.org/DOI:10.5897/AJPP11.739)

Mbaveng AT, Kuete V, 2017. Chapter 30 - *Zingiber officinale*, in: Kuete, V. (Ed.), Medicinal Spices and Vegetables from Africa. Academic Press, pp. 627-639, <https://doi.org/https://doi.org/10.1016/B978-0-12-809286-6.00030-3>.

Nakhare S, Garg SC (1992) Antimicrobial activity of the essential oil of *pavonia odorata* willd. Ancient science of life 12: 227-230.

Niu M, Wang RL, Wang ZX, Zhang P, Bai ZF, Jing J, Guo YM, Zhao X, Zhan XY, Zhang ZT, Song XA, Qin EQ, Wang JB, Xiao XH (2020) [Rapid establishment of traditional Chinese medicine prevention and treatment of 2019-nCoV based on clinical experience and molecular docking]. *Zhongguo Zhong Yao Za Zhi* 45: 1213-1218 <https://doi.org/10.19540/j.cnki.cjcmm.20200206.501>.

Nwinyi F, Kwanashie H, Ahmad A, Odama L (2009) Evaluation of toxicity profile of leaf base extract of *Sorghum bicolor* in rat African Journal of Biotechnology 8: 334-341.

Ojewole JA, Adewunmi CO (2004) Anti-inflammatory and hypoglycaemic effects of *Tetrapleura tetraptera* (Taub) [Fabaceae] fruit aqueous extract in rats. *J Ethnopharmacol* 95: 177-182 <https://doi.org/10.1016/j.jep.2004.06.026>.

Okhuarobo A, Falodun JE, Erharuyi O, Imieje V, Falodun A, Langer P (2014) Harnessing the medicinal properties of *Andrographis paniculata* for diseases and beyond: a review of its phytochemistry and pharmacology. *Asian Pacific Journal of Tropical Disease* 4: 213-222 [https://doi.org/10.1016/S2222-1808\(14\)60509-0](https://doi.org/10.1016/S2222-1808(14)60509-0).

Oladeji OS, Adelowo FE, Ayodele DT, Odelade KA (2019) Phytochemistry and pharmacological activities of *Cymbopogon citratus*: A review. *Scientific African* 6: e00137 <https://doi.org/https://doi.org/10.1016/j.sciaf.2019.e00137>.

Oyesiku O, Okusanya O, Olowokudejo J (2013) Morphological and anatomical investigations into the mechanism of leaf pair unrolling in *Uraria picta* (Jacq.) Desv. Ex DC. (Papilionaceae), a

medicinal plant in Nigeria. African journal of traditional, complementary, and alternative medicines : AJTCAM 10: 144-150 <https://doi.org/10.4314/ajtcam.v10i4.23>.

Oyeyemi IT, Akinlabi AA, Adewumi A, Aleshinloye AO, Oyeyemi OT (2018) Vernonia amygdalina: A folkloric herb with anthelmintic properties. Beni-Suef University Journal of Basic and Applied Sciences 7: 43-49 <https://doi.org/https://doi.org/10.1016/j.bjbas.2017.07.007>.

Paikra BK, Dhongade HKJ, Gidwani B (2017) Phytochemistry and Pharmacology of Moringa oleifera Lam. Journal of pharmacopuncture 20: 194-200 <https://doi.org/10.3831/KPI.2017.20.022>.

Paramanick D, Panday R, Shukla SS, Sharma V (2017) Primary Pharmacological and Other Important Findings on the Medicinal Plant "Aconitum Heterophyllum" (Aruna). Journal of pharmacopuncture 20: 89-92 <https://doi.org/10.3831/KPI.2017.20.011>.

Rahman S, Parvin R (2014) Therapeutic potential of Aegle marmelos (L.)-An overview. Asian Pacific Journal of Tropical Disease 4: 71-77 [https://doi.org/10.1016/S2222-1808\(14\)60318-2](https://doi.org/10.1016/S2222-1808(14)60318-2).

Ranasinghe P, Pigera S, Premakumara GAS, Galappaththy P, Constantine GR, Katulanda P (2013) Medicinal properties of 'true' cinnamon (Cinnamomum zeylanicum): a systematic review. BMC Complementary and Alternative Medicine 13: 275 <https://doi.org/10.1186/1472-6882-13-275>.

Rasool S, Maqbool M (2019) (2019). An overview about Hedychium spicatum: a review. Journal of Drug Delivery and Therapeutics 9: 476-480 <https://doi.org/https://doi.org/10.22270/jddt.v9i1-s.2429>.

Rastogi S, Pandey MM, Rawat AKS (2011) An ethnomedicinal, phytochemical and pharmacological profile of Desmodium gangeticum (L.) DC. and Desmodium adscendens (Sw.) DC. Journal of Ethnopharmacology 136: 283-296 <https://doi.org/https://doi.org/10.1016/j.jep.2011.04.031>.

Rawat R, Vashistha D (2011) Common Herbal Plant in Uttarakhand, Used in The Popular Medicinal Preparation in Ayurveda. International Journal of Pharmacognosy and Phytochemical Research 3: 64-73.

Ruan X, Du P, Zhao K, Huang J, Xia H, Dai D, Huang S, Cui X, Liu L, Zhang J (2020) Mechanism of Dayuanyin in the treatment of coronavirus disease 2019 based on network pharmacology and molecular docking. Chinese Medicine 15: 62 <https://doi.org/10.1186/s13020-020-00346-6>.

Satyral P, Paudel P, Poudel A, Dosoky N, Pokharel K, Setzera W (2013) Bioactivities and Compositional Analyses of Cinnamomum Essential Oils from Nepal: *C. camphora*, *C. tamala*, and *C. glaucescens*. . Natural Product Communications 8: 1777 -1784

Shah KA, Patel MB, Patel RJ, Parmar PK (2010) *Mangifera indica* (mango). Pharmacognosy reviews 4: 42-48 <https://doi.org/10.4103/0973-7847.65325>.

Shi-Ying Z, Ling L, Ning Z, Hong-Tao X, Fang-Guo L, Wei-Qing L (2020) Systematic Pharmacological Strategies to Explore the Regulatory Mechanism of Ma Xing Shi Gan Decoction on COVID-19. Digital Chinese Medicine 3: 96-115 <https://doi.org/https://doi.org/10.1016/j.dcm.2020.06.004>.

Singh B, Gupta V, Bansal P, Kumar D, Murali K (2011) Pharmacological Potential of Polyherbal Formulation, Sudarshan Churna – A Review. International Journal of Ayurvedic Medicine 2: 2(2): 52-61

Sinha D (2019) A review on phytochemical, ethnobotanical, pharmacological, and antimicrobial importance of *Cedrus deodara* (Roxb. Ex D. Don) G. Don. . International Journal of Green Pharmacy 13: 1-12.

Soni V, Arun Kumar J, Dewedi J (2012) A review on ethnomedical uses, phytochemicals and pharmacological profile of *Bambusa arudinacea* Retz: . Indian Journal of Novel Drug delivery 4: 264-271.

Sonibare MA, Gbile ZO (2008) Ethnobotanical survey of anti-asthmatic plants in South Western Nigeria. African journal of traditional, complementary, and alternative medicines : AJTCAM 5: 340-345 <https://doi.org/10.4314/ajtcam.v5i4.31288>.

Srivastava B, Sharma H, Dey Y, Wanjari M, Jadhav A (2014) Alhagi pseudalhagi: a review of its phyto-chemistry, pharmacology, folklore claims and Ayurvedic studies. . International Journal of Herbal Medicine 2 47-51.

Teshika JD, Zakariyyah AM, Zaynab T, Zengin G, Rengasamy KR, Pandian SK, Fawzi MM (2019) Traditional and modern uses of onion bulb (*Allium cepa* L.): a systematic review. Crit Rev Food Sci Nutr 59: S39-s70 <https://doi.org/10.1080/10408398.2018.1499074>.

Tian G, Li C, Zhai Y, Xu J, Feng L, Yao W, Bao B, Zhang L, Ding A (2020) GC-MS based metabolomic profiling of lung tissue couple with network pharmacology revealed the possible protection mechanism of Pudilan Xiaoyan Oral Liquid in LPS-induced lung injury of mice. Biomedicine & Pharmacotherapy 124: 109833 <https://doi.org/10.1016/j.biopha.2020.109833>.

Variya BC, Bakrania AK, Patel SS (2016) *Emblica officinalis* (Amla): A review for its phytochemistry, ethnomedicinal uses and medicinal potentials with respect to molecular mechanisms. Pharmacological Research 111: 180-200 <https://doi.org/10.1016/j.phrs.2016.06.013>.

Vij T, Prashar Y (2015) A review on medicinal properties of *Carica papaya* Linn. Asian Pacific Journal of Tropical Disease 5: 1-6 [https://doi.org/10.1016/S2222-1808\(14\)60617-4](https://doi.org/10.1016/S2222-1808(14)60617-4).

Wang CH, Zhong Y, Zhang Y, Liu JP, Wang YF, Jia WN, Wang GC, Li Z, Zhu Y, Gao XM (2016) A network analysis of the Chinese medicine Lianhua-Qingwen formula to identify its main effective components. Mol Biosyst 12: 606-613 <https://doi.org/10.1039/c5mb00448a>.

Wang P, Yang J, Zhu Z, Zhang X (2018) *Marsdenia tenacissima*: A Review of Traditional Uses, Phytochemistry and Pharmacology. Am J Chin Med: 1-32 <https://doi.org/10.1142/s0192415x18500751>.

Weerakoon WASS, Perera PK, Gunasekera D, Suresh TS (2018) Evaluation of the In Vitro and In Vivo Antioxidant Potentials of Sudarshana Powder. Evidence-based complementary and alternative medicine : eCAM 2018: 6743862-6743862 <https://doi.org/10.1155/2018/6743862>.

Wiki T, 2020. Traditional Chinese Medicine Theory.

Yang F, Dong X, Yin X, Wang W, You L, Ni J (2017) Radix Bupleuri: A Review of Traditional Uses, Botany, Phytochemistry, Pharmacology, and Toxicology. *BioMed research international* 2017: 7597596-7597596 <https://doi.org/10.1155/2017/7597596>.

Yang Y, Islam MS, Wang J, Li Y, Chen X (2020) Traditional Chinese Medicine in the Treatment of Patients Infected with 2019-New Coronavirus (SARS-CoV-2): A Review and Perspective. *International journal of biological sciences* 16: 1708-1717 <https://doi.org/10.7150/ijbs.45538>.
